# Supplementary material for: Sulfated alginate oligosaccharide exerts antitumor activity and autophagy induction by inactivating MEK1/ERK/mTOR signaling in a KSR1-dependent manner in osteosarcoma
Source: PubMed Central journal article supplement (PMC9008062; doi:10.1038/s41389-022-00390-x), 2022-04-13
Supplement: 41389_2022_390_MOESM2_ESM.pdf [file 41389_2022_390_MOESM2_ESM.pdf]

Declaration of Interest Statement:

On behalf of all authors, I would like to declare that there is no conflict of interest exists in the submission of this manuscript, and manuscript is approved by all authors for publication.

Qing-cheng Yang, M.D.

Department of Orthopedics,

Shanghai Jiao Tong University Affiliated Sixth People's Hospital

E-mail: [tjqc@163.com](mailto:tjqc@163.com)
